# Supplementary material
Source: PubMed Central journal article supplement (PMC2880228)

## Supplemental Figure 1 (related to Fig. 1)

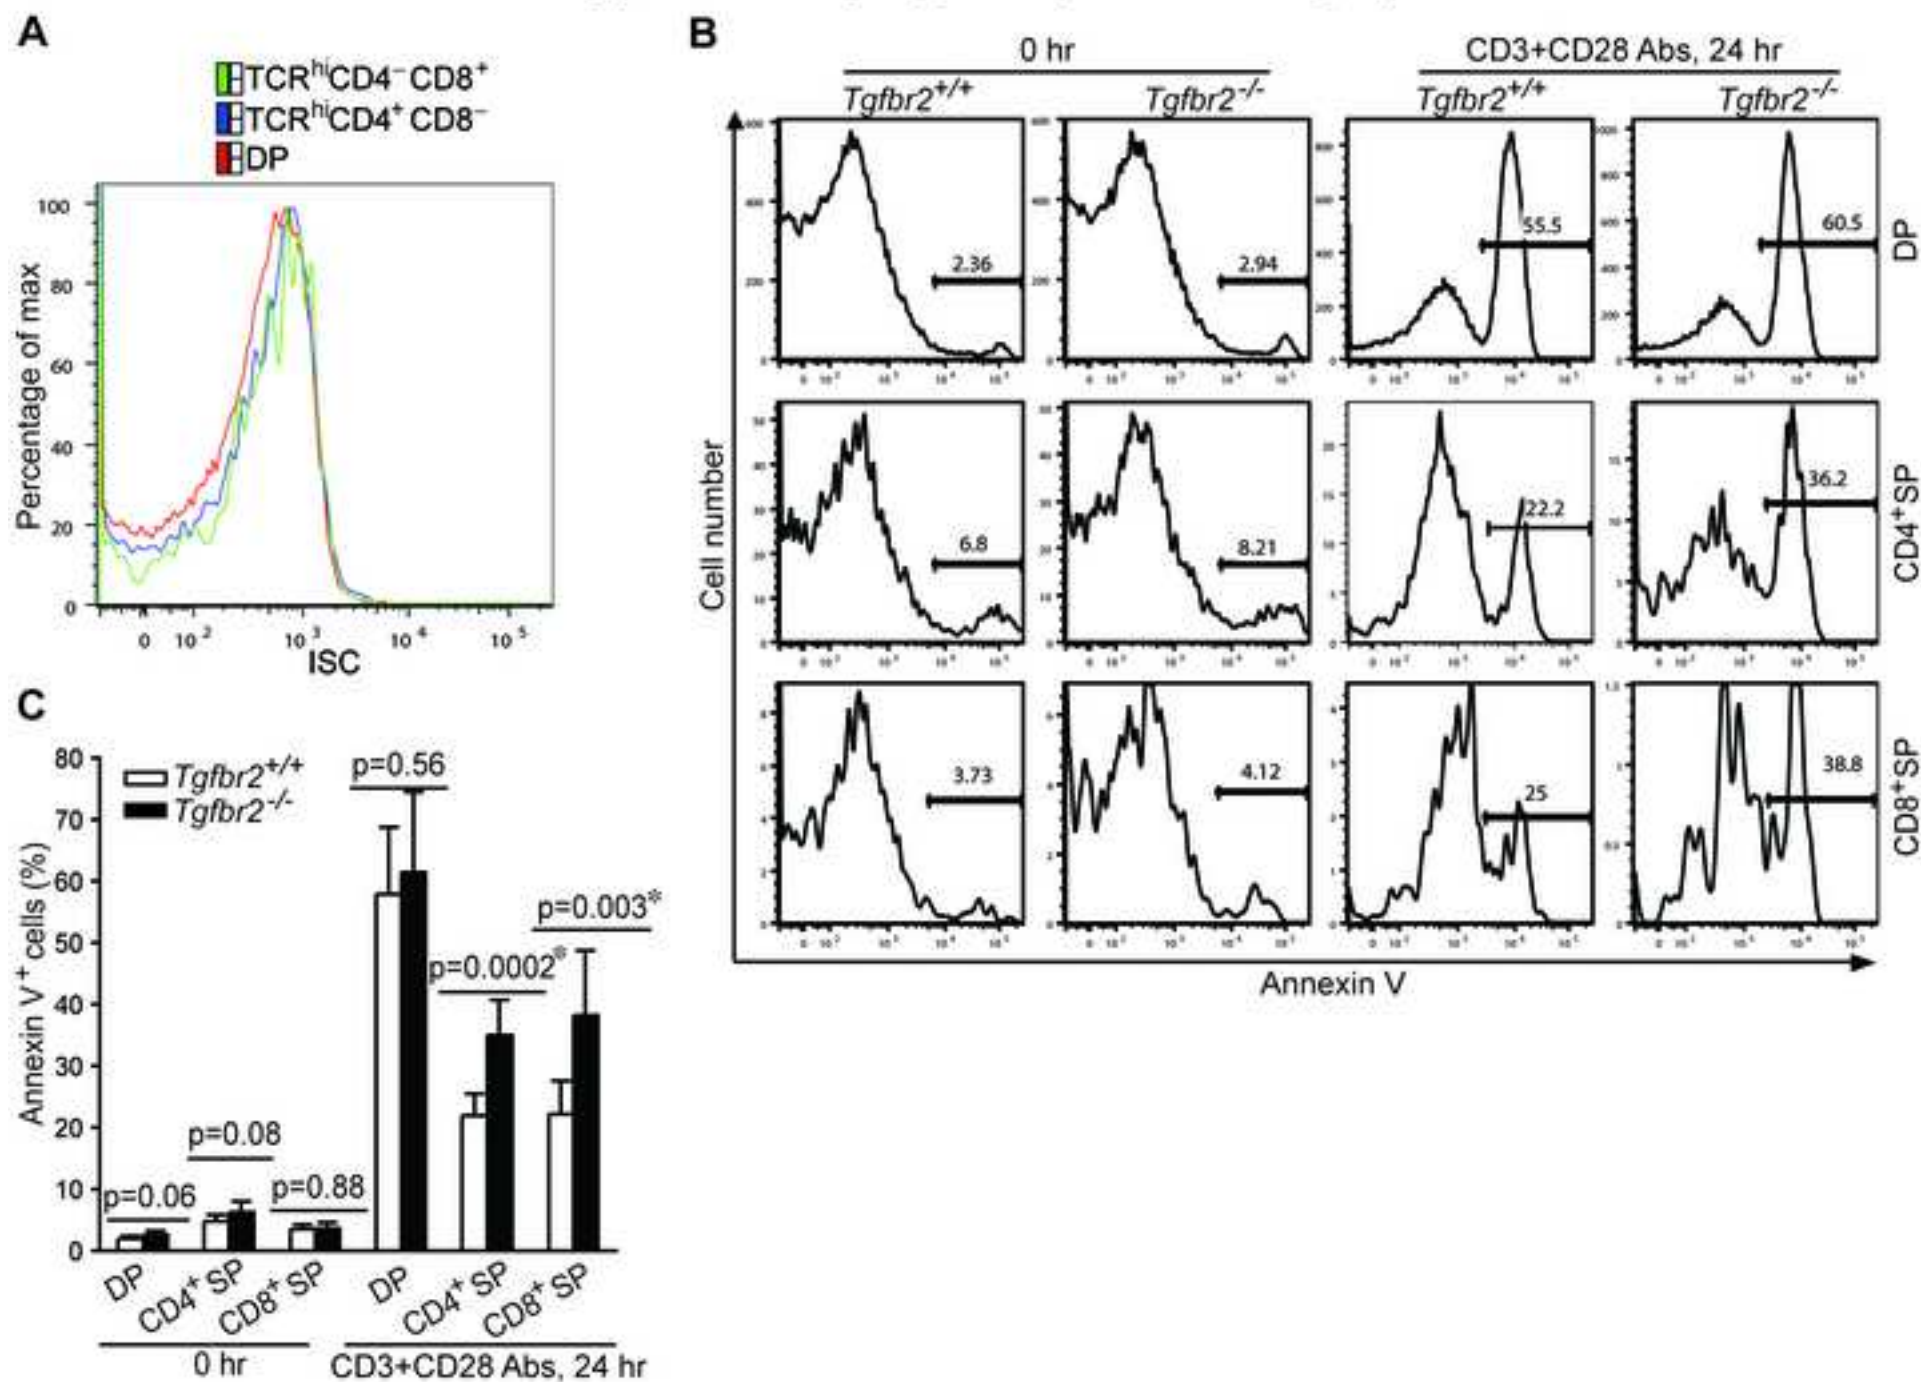

## Supplementary Figure 2 (related to Fig. 2)

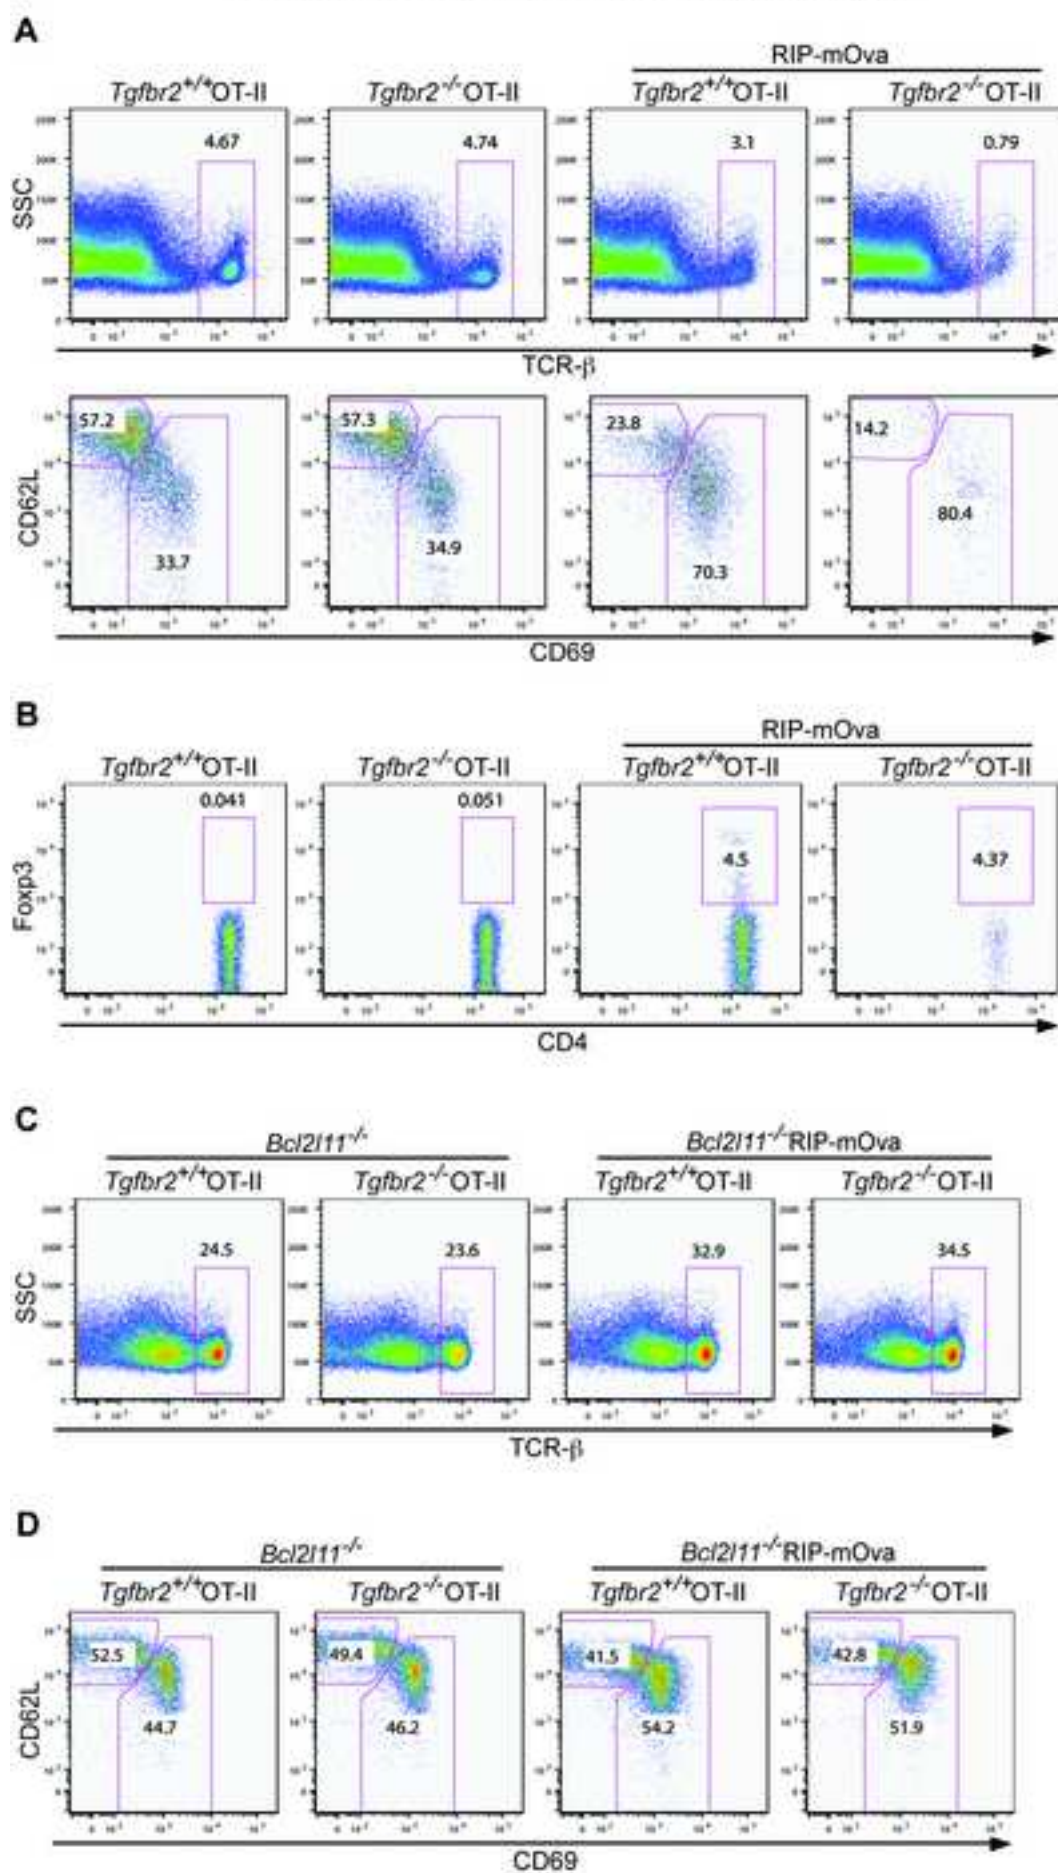

## Supplementary Figure 3 (related to Fig. 4)

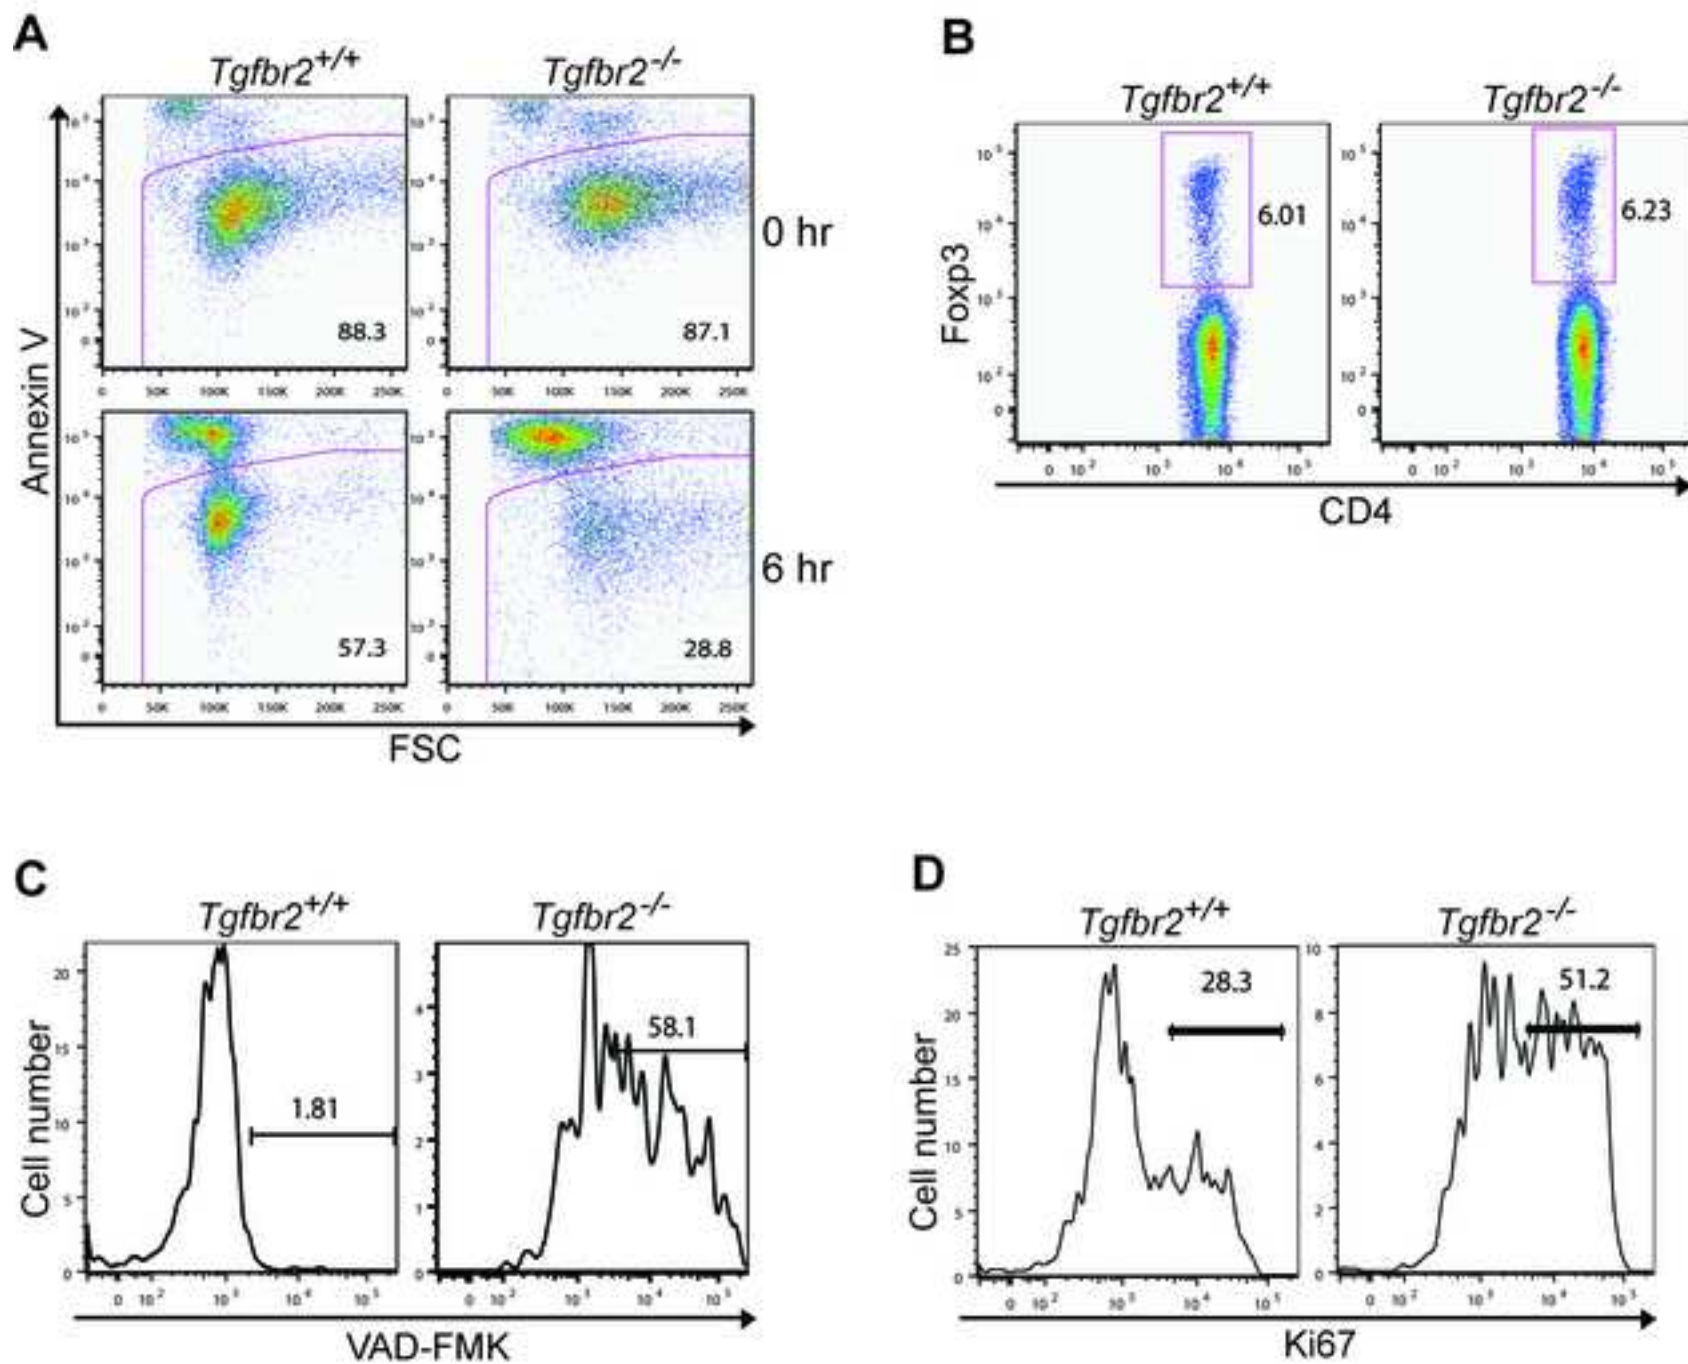

Supplementary Figure 4 (related to Fig. 5)

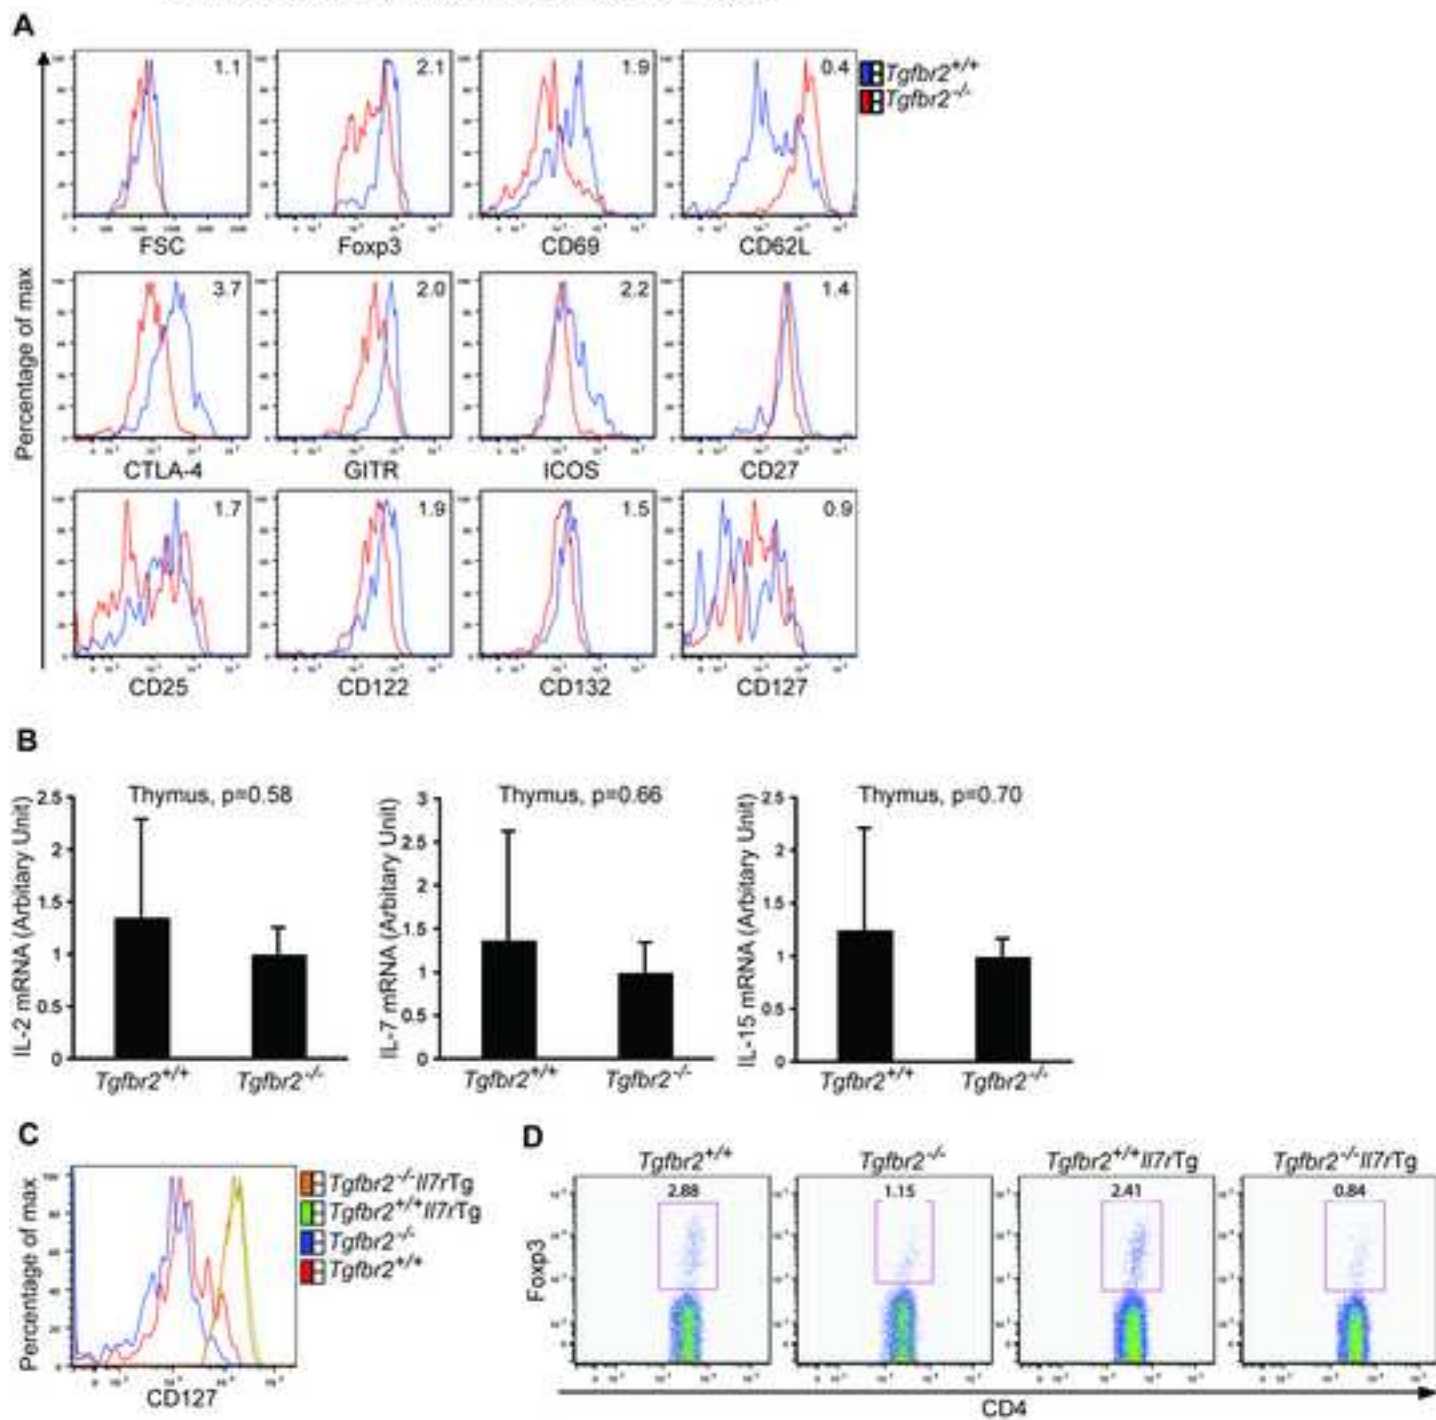

## Supplementary Figure 5 (related to Fig. 6)

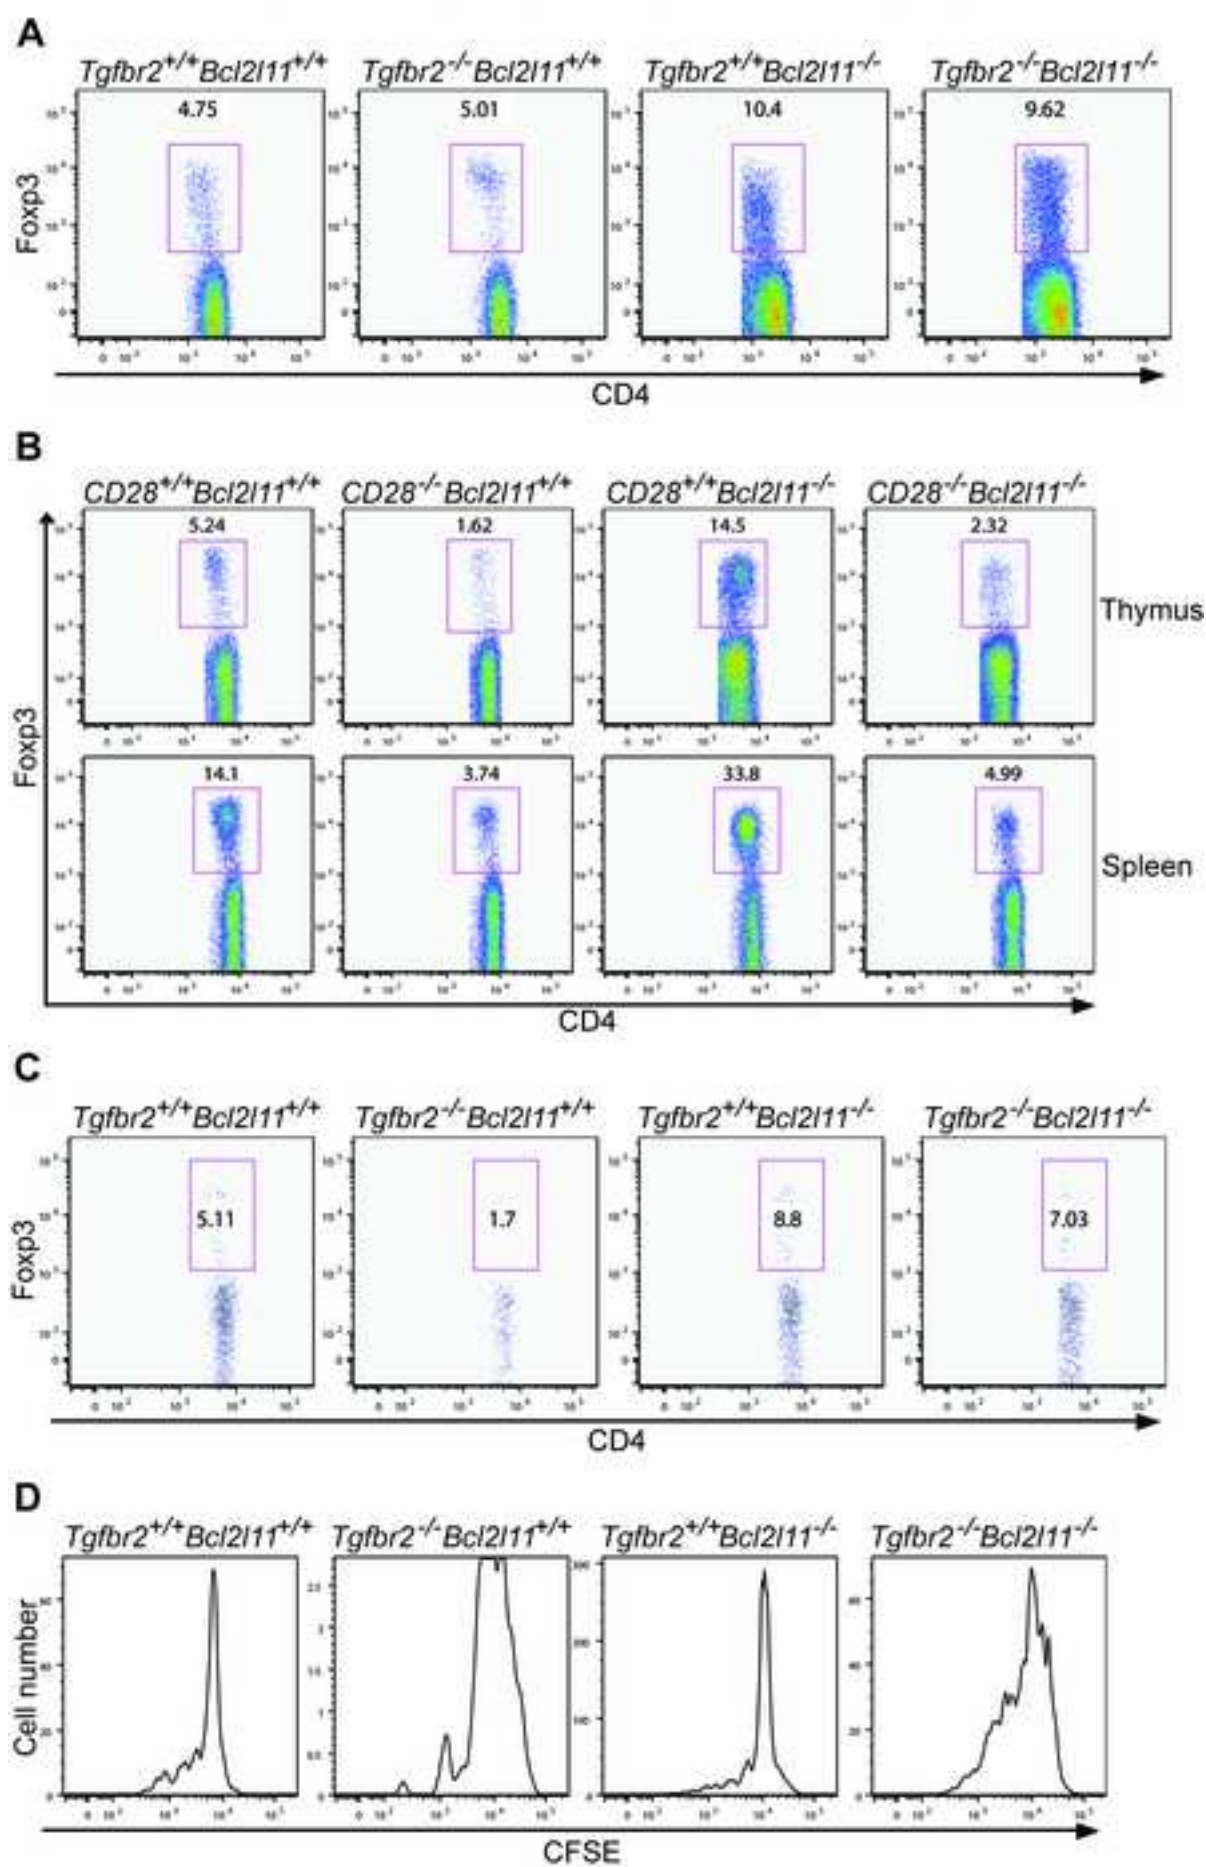

### Supplementary Figure 6 (related to Fig. 7)

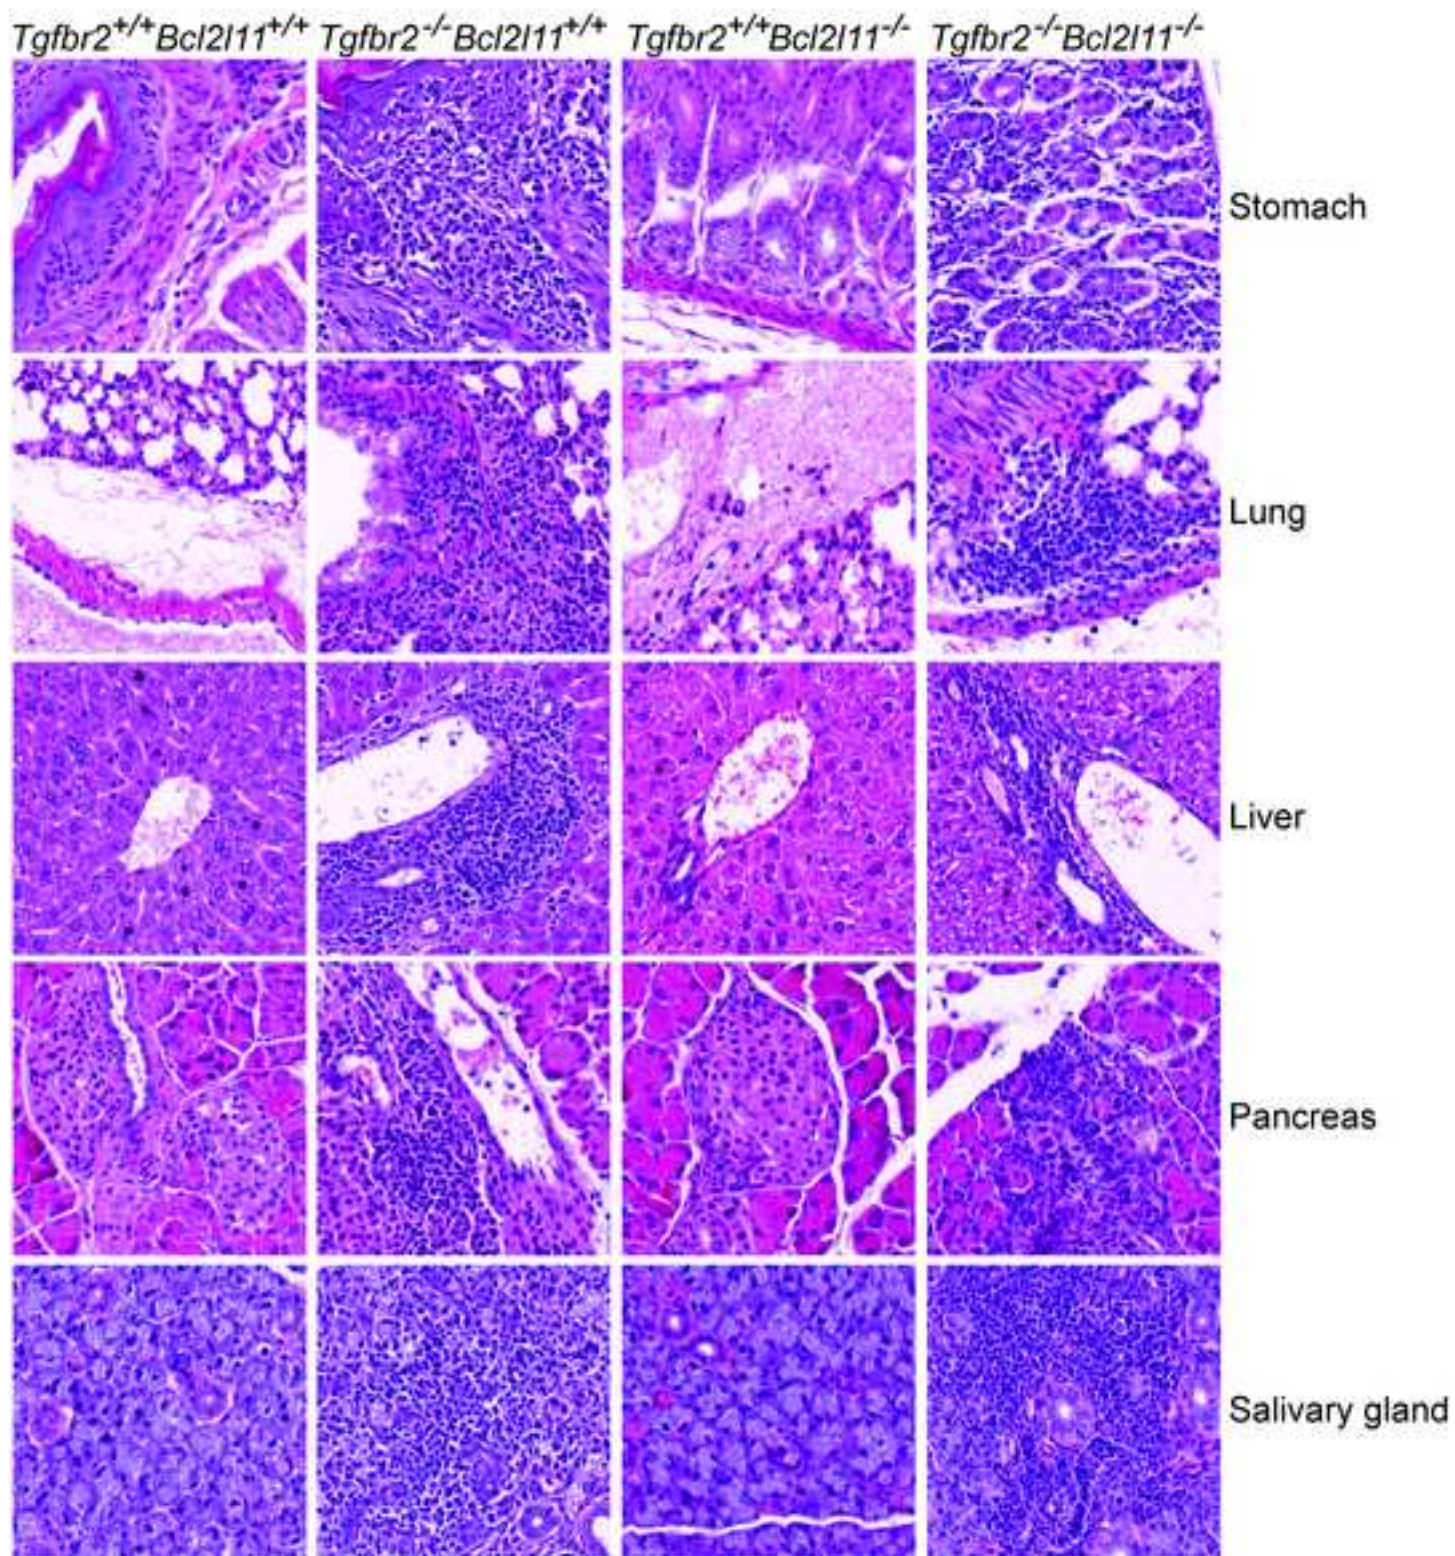

Supplement: NIHMS200601-supplement-01.pdf [file NIHMS200601-supplement-01.pdf]
